# Supplementary material for: A prospective study on the effect of self-reported health and leisure time physical activity on mortality among an ageing population: results from the Tromsø study
Source: Springer Nature journal article supplement (doi:10.1186/s12889-020-08681-x), 2020-04-28

Supplementary Figure 1. Activity level according to age and sex

1994

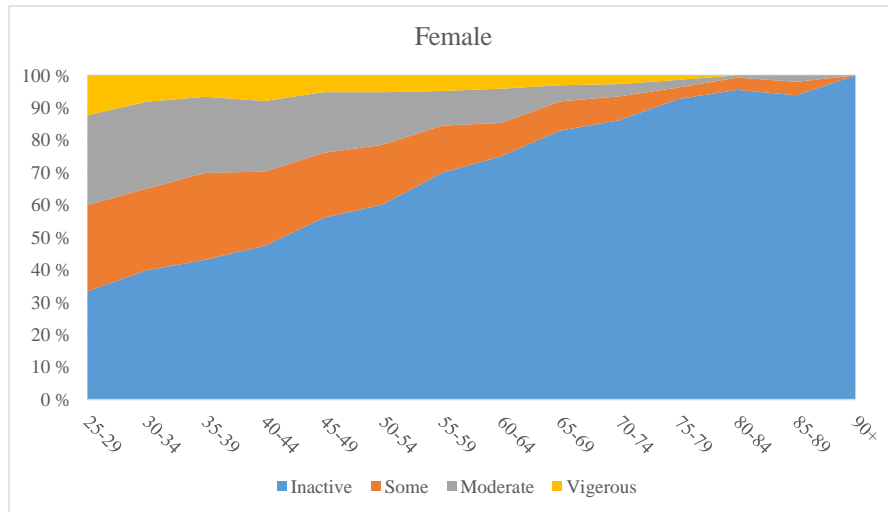

2007

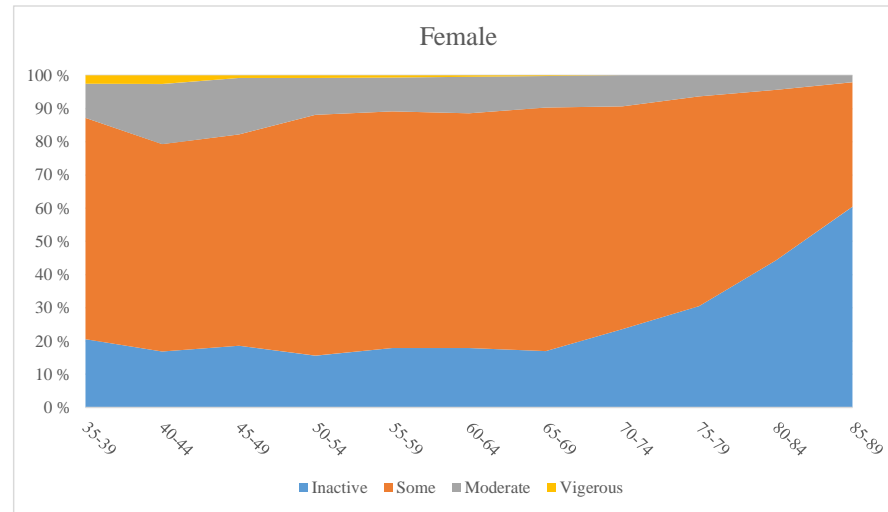

Male

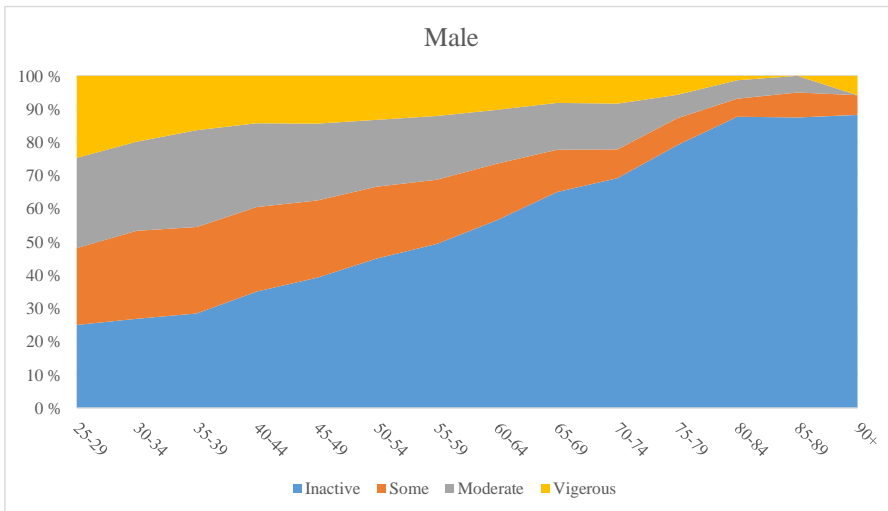

Male

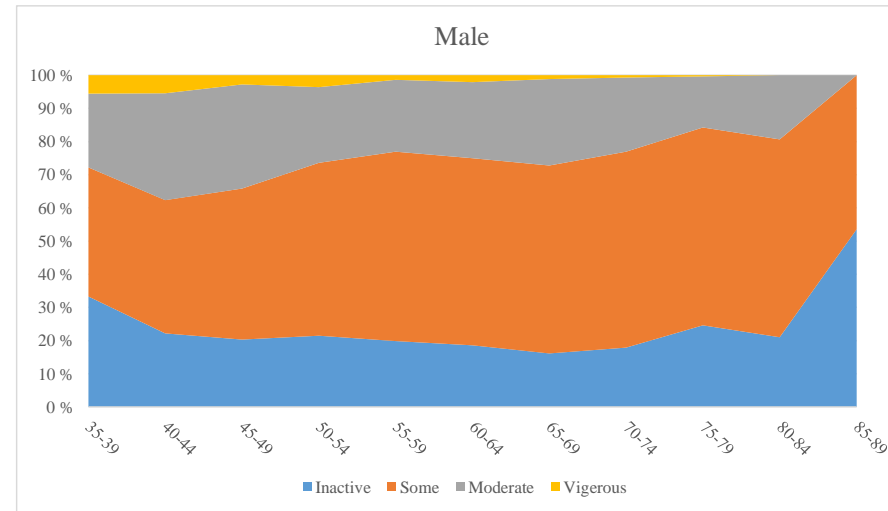

Supplement: MOESM1 [file 17937238]
