# Supplementary material for: A prospective study on the effect of self-reported health and leisure time physical activity on mortality among an ageing population: results from the Tromsø study
Source: Springer Nature journal article supplement (doi:10.1186/s12889-020-08681-x), 2020-04-28
Supplement: MOESM2 [file 17937238]

Supplementary Table 2. Results from the random-coefficient proportional odds model with estimates for the gender specific associations of subject-specific factors on Self-Reported Health.

|                                | Female |          |      | Male |          |      |
|--------------------------------|--------|----------|------|------|----------|------|
|                                | OR     | (95% CI) |      | OR   | (95% CI) |      |
| <b>Hard physical activity</b>  |        |          |      |      |          |      |
| Sedentary (reference)          | 1,00   |          |      | 1,00 |          |      |
| Some high intensity            | 1,15   | 1,03     | 1,29 | 1,26 | 1,11     | 1,43 |
| Moderate high intensity        | 1,62   | 1,40     | 1,87 | 2,23 | 1,92     | 2,59 |
| Vigorously high intensity      | 2,00   | 1,55     | 2,57 | 3,31 | 2,70     | 4,04 |
| <b>Light physical activity</b> |        |          |      |      |          |      |
| None (reference)               | 1,00   |          |      | 1,00 |          |      |
| <1 Hour                        | 1,20   | 0,96     | 1,50 | 0,95 | 0,77     | 1,17 |
| 1-2 hour                       | 1,39   | 1,12     | 1,71 | 1,26 | 1,03     | 1,54 |
| >3 hours                       | 1,62   | 1,32     | 1,99 | 1,29 | 1,06     | 1,58 |
| <b>Gender and age</b>          |        |          |      |      |          |      |
| Age (10 year)                  | 0,55   | 0,52     | 0,57 | 0,57 | 0,53     | 0,60 |
| Gender                         | 0,89   | 0,81     | 0,98 | 0,88 | 0,81     | 0,95 |

The model is controlled for all covariates
