# Supplementary material for: A prospective study on the effect of self-reported health and leisure time physical activity on mortality among an ageing population: results from the Tromsø study
Source: Springer Nature journal article supplement (doi:10.1186/s12889-020-08681-x), 2020-04-28
Supplement: MOESM3 [file 17937238]

Supplementary Table 3. Hazard ratio for all-cause death between combinations of categories of hard and light physical activity levels over as time-dependent covariates.

|                                                             |                               | Hazard ratio [95% Conf, Interval] |              |
|-------------------------------------------------------------|-------------------------------|-----------------------------------|--------------|
| <b>Light physical activity levels</b>                       |                               |                                   |              |
| None                                                        |                               | 0,97                              | (0,67, 1,42) |
| <1 hour per week                                            |                               | 1,38                              | (0,89, 2,13) |
| 1-2 hours per week                                          |                               | 1,18                              | (0,87, 1,62) |
| >3 hours per week                                           |                               |                                   |              |
| <b>Hard physical activity levels</b>                        |                               |                                   |              |
| None                                                        |                               | 1,56                              | (1,34, 1,83) |
| Low                                                         |                               | 1,16                              | (0,96, 1,40) |
| Moderate                                                    |                               | 1,06                              | (0,88, 1,27) |
| Vigorous                                                    |                               |                                   |              |
| <b>Interaction</b>                                          |                               |                                   |              |
| Light physical activity levels                              | Hard physical activity levels |                                   |              |
| <i>None</i>                                                 | <i>None</i>                   | 1,57                              | (1,07, 2,31) |
| <i>None</i>                                                 | <i>Some</i>                   | 1,20                              | (0,62, 2,30) |
| <i>None</i>                                                 | <i>Moderate</i>               | 0,88                              | (0,50, 1,54) |
| <i>&lt;1 hour per week</i>                                  | <i>None</i>                   | 0,85                              | (0,54, 1,32) |
| <i>&lt;1 hour per week</i>                                  | <i>Some</i>                   | 0,65                              | (0,40, 1,07) |
| <i>&lt;1 hour per week</i>                                  | <i>Moderate</i>               | 0,59                              | (0,33, 1,03) |
| <i>1-2 hours per week</i>                                   | <i>None</i>                   | 0,87                              | (0,63, 1,20) |
| <i>1-2 hours per week</i>                                   | <i>Some</i>                   | 0,73                              | (0,51, 1,04) |
| <i>1-2 hours per week</i>                                   | <i>Moderate</i>               | 0,81                              | (0,56, 1,17) |
| <i>Test statistics: LR chi2(17) = 10633.14, p&lt;0.0001</i> |                               |                                   |              |
